# Supplementary material
Source: Royal Society of Chemistry journal article supplement (doi:10.1039/d6tc00400h)
Supplement: d6tc00400h1.pdf [file d6tc00400h1.pdf]

## Supplementary information (SI) for

### Graphene has a finite band gap originating from the exchange term of self-energy

Koshi Okamura

*Ronin Institute (RIIS 2.0), Sacramento, California 95816, USA and  
Ronin Institute, Montclair, New Jersey 07043, USA*

#### Character tables of $P6/mmm$

The character tables at the  $\Gamma$ ,  $M$ , and  $K$  points of the space group  $P6/mmm$  are summarized in Tables SI–SIII.

#### Representation of atomic orbital

The atomic orbital is represented in the full-rotation group by  $\Gamma_{jl}^{\text{orb}}$  and composed of an orbital function and spin function. The orbital function and spin function are transformed by the rotation, while only the orbital function is transformed by the inversion. The character  $\chi_{jl}^{\text{orb}}$  of the point-group symmetry is thus described as [S1, S2]

$$\chi_{jl}^{\text{orb}}\{\alpha\} = \frac{\sin(j + \frac{1}{2})\alpha}{\sin\frac{1}{2}\alpha}, \quad (\text{S1})$$

$$\chi_{jl}^{\text{orb}}\{\bar{\alpha}\} = (-1)^l \frac{\sin(j + \frac{1}{2})\alpha}{\sin\frac{1}{2}\alpha}, \quad (\text{S2})$$

where  $j$  is the total angular quantum number,  $l$  is the orbital angular quantum number,  $\{\alpha\}$  is the  $\frac{2\pi}{\alpha}$ -fold rotation, and  $\{\bar{\alpha}\}$  is the  $\frac{2\pi}{\alpha}$ -fold rotoinversion. The atomic orbital is then subduced to the space group of a condensed-matter system and represented by  $\Gamma^{\text{orb}}$ .  $\Gamma^{\text{orb}}$ 's at the  $\Gamma$ ,  $M$ , and  $K$  points of the space group  $P6/mmm$  are summarized in Tables SIV–SVI.

#### Representation of atomic arrangement

The atomic arrangement is represented in the space group by  $\Gamma^{\text{arr}}$  and described by the Bloch function as

$$\begin{aligned} f_{\mathbf{k}}(\mathbf{r}) &= g_{\mathbf{k}}(\mathbf{r})e^{i\mathbf{k}\cdot\mathbf{r}}, \\ g_{\mathbf{k}}(\mathbf{r}) &= \sum_i \delta(\mathbf{r} - \mathbf{r}_i), \end{aligned} \quad (\text{S3})$$

where  $g_{\mathbf{k}}(\mathbf{r})$  is the cell-periodic function and  $\mathbf{r}_i$  is the atomic position. The character  $\chi^{\text{arr}}$  of the space-group

symmetry  $\{P|\boldsymbol{\tau} + \mathbf{R}\}$  is thus described as [S3–S6]

$$\begin{aligned} \chi^{\text{arr}}\{P|\boldsymbol{\tau} + \mathbf{R}\} &= \langle f_{\mathbf{k}}|\{P|\boldsymbol{\tau} + \mathbf{R}\}f_{\mathbf{k}}\rangle \\ &= e^{-i\mathbf{k}\cdot\mathbf{R}}e^{-i(\mathbf{k}+\mathbf{G})\cdot\boldsymbol{\tau}}\langle g_{\mathbf{k}}|e^{i\mathbf{G}\cdot\mathbf{r}}\{P|\boldsymbol{\tau} + \mathbf{R}\}g_{\mathbf{k}}\rangle \\ &= e^{-i\mathbf{k}\cdot\mathbf{R}}e^{-i(\mathbf{k}+\mathbf{G})\cdot\boldsymbol{\tau}} \\ &\quad \times \sum_i \langle \delta(\mathbf{r} - \mathbf{r}_i)|e^{i\mathbf{G}\cdot\mathbf{r}}\delta(\{P|\boldsymbol{\tau} + \mathbf{R}\}^{-1}\mathbf{r} - \mathbf{r}_i)\rangle \\ &= e^{-i\mathbf{k}\cdot\mathbf{R}}e^{-i(\mathbf{k}+\mathbf{G})\cdot\boldsymbol{\tau}} \sum_i e^{i\mathbf{G}\cdot\mathbf{r}_i}\delta(\{P|\boldsymbol{\tau} + \mathbf{R}\}^{-1}\mathbf{r}_i - \mathbf{r}_i) \\ &= e^{-i\mathbf{k}\cdot\mathbf{R}}e^{-i(\mathbf{k}+\mathbf{G})\cdot\boldsymbol{\tau}} \sum_i e^{i\mathbf{G}\cdot\mathbf{r}_i}\delta[P^{-1}(\mathbf{r}_i - \boldsymbol{\tau}) - \mathbf{r}_i], \end{aligned} \quad (\text{S4})$$

where  $P$  is the point-group symmetry,  $\boldsymbol{\tau}$  is the fractional lattice vector,  $\mathbf{R}$  is the lattice vector,  $\mathbf{G}$  is the reciprocal lattice vector, and  $\mathbf{k}\cdot P^{-1}[\mathbf{r} - (\boldsymbol{\tau} + \mathbf{R})] = P\mathbf{k}\cdot[\mathbf{r} - (\boldsymbol{\tau} + \mathbf{R})]$  and  $P\mathbf{k} = \mathbf{k} + \mathbf{G}$  are employed. The atomic arrangement can be described in the symmorphic group of  $\boldsymbol{\tau} = \mathbf{0}$  as

$$\chi^{\text{arr}}\{P|\mathbf{R}\} = e^{-i\mathbf{k}\cdot\mathbf{R}} \sum_i e^{i\mathbf{G}\cdot\mathbf{r}_i}\delta(P^{-1}\mathbf{r}_i - \mathbf{r}_i). \quad (\text{S5})$$

$\Gamma^{\text{equiv}}$ 's of graphene at the  $\Gamma$ ,  $M$ , and  $K$  points of the space group  $P6/mmm$  are summarized in Tables SVII–SIX.

#### Representation of atomic wavefunction

The atomic wavefunction is represented by the direct product of the atomic orbital and atomic arrangement as  $\Gamma^{\text{orb}} \otimes \Gamma^{\text{arr}}$ . The representations of graphene at the  $\Gamma$ ,  $M$ , and  $K$  points of the space group  $P6/mmm$  are summarized in Tables SX–SXII.

- 
- [S1] M. Lax, *Symmetry Principles in Solid State and Molecular Physics* (Dover Publications, Inc., Mineola, 2001).
- [S2] M. Tinkham, *Group Theory and Quantum Mechanics* (Dover Publications, Inc., Mineola, 2003).
- [S3] W. M. Lomer, The valence bands in two-dimensional graphite, Proc. R. Soc. London, Ser. A **227**, 330 (1955).
- [S4] M. S. Dresselhaus, G. Dresselhaus, and A. Jorio, *Group Theory* (Springer-Verlag, Berlin, 2008).
- [S5] K. Okamura, Focus on the overlap density of wavefunctions in *GW* approximations, Phys. Chem. Chem. Phys. **22**, 5366 (2020).
- [S6] K. Okamura, Bloch state constrained by spatial and time-reversal symmetries, J. Phys. A: Math. Theor. **56**, 335003 (2023).

TABLE SI. Character table at the  $\Gamma$  point [ $\mathbf{k}_\Gamma = \frac{2\pi}{a}(0, 0, 0)$ ] of the space group  $P6/mmm$ , which transforms isomorphically to the point group  $6/mmm$  ( $D_{6h}$ ).

|                     | {1} <sup>a</sup> | {2} <sup>b</sup> | {2 <sub>v</sub> } <sup>c</sup> | {2 <sub>v'</sub> } <sup>d</sup> | {3} <sup>e</sup> | {6} <sup>f</sup> | {1} <sup>g</sup> | {m} <sup>h</sup> | {m <sub>v</sub> } <sup>i</sup> | {m <sub>v'</sub> } <sup>j</sup> | {3} <sup>k</sup> | {6} <sup>l</sup> | {d1} <sup>m</sup> | {d3} <sup>n</sup> | {d6} <sup>o</sup> | {d1} <sup>p</sup> | {d3} <sup>q</sup> | {d6} <sup>r</sup> | Type <sup>s</sup> |
|---------------------|------------------|------------------|--------------------------------|---------------------------------|------------------|------------------|------------------|------------------|--------------------------------|---------------------------------|------------------|------------------|-------------------|-------------------|-------------------|-------------------|-------------------|-------------------|-------------------|
| $\Gamma_1^+$        | 1                | 1                | 1                              | 1                               | 1                | 1                | 1                | 1                | 1                              | 1                               | 1                | 1                | 1                 | 1                 | 1                 | 1                 | 1                 | 1                 | (a)               |
| $\Gamma_1^-$        | 1                | 1                | 1                              | 1                               | 1                | 1                | -1               | -1               | -1                             | -1                              | -1               | -1               | 1                 | 1                 | 1                 | -1                | -1                | -1                | (a)               |
| $\Gamma_2^+$        | 1                | 1                | -1                             | -1                              | 1                | 1                | 1                | 1                | -1                             | -1                              | 1                | 1                | 1                 | 1                 | 1                 | 1                 | 1                 | 1                 | (a)               |
| $\Gamma_2^-$        | 1                | 1                | -1                             | -1                              | 1                | 1                | -1               | -1               | 1                              | 1                               | -1               | -1               | 1                 | 1                 | 1                 | -1                | -1                | -1                | (a)               |
| $\Gamma_3^+$        | 1                | -1               | 1                              | -1                              | 1                | -1               | 1                | -1               | 1                              | -1                              | 1                | -1               | 1                 | 1                 | -1                | 1                 | 1                 | -1                | (a)               |
| $\Gamma_3^-$        | 1                | -1               | 1                              | -1                              | 1                | -1               | -1               | 1                | -1                             | 1                               | -1               | 1                | 1                 | 1                 | -1                | -1                | -1                | 1                 | (a)               |
| $\Gamma_4^+$        | 1                | -1               | -1                             | 1                               | 1                | -1               | 1                | -1               | -1                             | 1                               | 1                | -1               | 1                 | 1                 | -1                | 1                 | 1                 | -1                | (a)               |
| $\Gamma_4^-$        | 1                | -1               | -1                             | 1                               | 1                | -1               | -1               | 1                | 1                              | -1                              | -1               | 1                | 1                 | 1                 | -1                | -1                | -1                | 1                 | (a)               |
| $\Gamma_5^+$        | 2                | 2                | 0                              | 0                               | -1               | -1               | 2                | 2                | 0                              | 0                               | -1               | -1               | 2                 | -1                | -1                | 2                 | -1                | -1                | (a)               |
| $\Gamma_5^-$        | 2                | 2                | 0                              | 0                               | -1               | -1               | -2               | -2               | 0                              | 0                               | 1                | 1                | 2                 | -1                | -1                | -2                | 1                 | 1                 | (a)               |
| $\Gamma_6^+$        | 2                | -2               | 0                              | 0                               | -1               | 1                | 2                | -2               | 0                              | 0                               | -1               | 1                | 2                 | -1                | 1                 | 2                 | -1                | 1                 | (a)               |
| $\Gamma_6^-$        | 2                | -2               | 0                              | 0                               | -1               | 1                | -2               | 2                | 0                              | 0                               | 1                | -1               | 2                 | -1                | 1                 | -2                | 1                 | -1                | (a)               |
| $\bar{\Gamma}_7$    | 2                | 0                | 0                              | 0                               | -2               | 0                | 2                | 0                | 0                              | 0                               | -2               | 0                | -2                | 2                 | 0                 | -2                | 2                 | 0                 | (b)               |
| $\bar{\Gamma}_8$    | 2                | 0                | 0                              | 0                               | 1                | $-\sqrt{3}$      | 2                | 0                | 0                              | 0                               | 1                | $-\sqrt{3}$      | -2                | -1                | $\sqrt{3}$        | -2                | -1                | $\sqrt{3}$        | (b)               |
| $\bar{\Gamma}_9$    | 2                | 0                | 0                              | 0                               | 1                | $\sqrt{3}$       | 2                | 0                | 0                              | 0                               | 1                | $\sqrt{3}$       | -2                | -1                | $-\sqrt{3}$       | -2                | -1                | $-\sqrt{3}$       | (b)               |
| $\bar{\Gamma}_{10}$ | 2                | 0                | 0                              | 0                               | -2               | 0                | -2               | 0                | 0                              | 0                               | 2                | 0                | -2                | 2                 | 0                 | 2                 | -2                | 0                 | (b)               |
| $\bar{\Gamma}_{11}$ | 2                | 0                | 0                              | 0                               | 1                | $-\sqrt{3}$      | -2               | 0                | 0                              | 0                               | -1               | $\sqrt{3}$       | -2                | -1                | $\sqrt{3}$        | 2                 | 1                 | $-\sqrt{3}$       | (b)               |
| $\bar{\Gamma}_{12}$ | 2                | 0                | 0                              | 0                               | 1                | $\sqrt{3}$       | -2               | 0                | 0                              | 0                               | -1               | $-\sqrt{3}$      | -2                | -1                | $-\sqrt{3}$       | 2                 | 1                 | $\sqrt{3}$        | (b)               |

<sup>a</sup>  $\{1|\mathbf{R}_n = n_1\mathbf{a}_1 + n_2\mathbf{a}_2 + n_3\mathbf{a}_3\}$ , where  $\mathbf{a}_1 = a(\frac{\sqrt{3}}{2}, -\frac{1}{2}, 0)$ ,  $\mathbf{a}_2 = a(0, 1, 0)$ , and  $\mathbf{a}_3 = c(0, 0, 1)$  and  $n_1$ ,  $n_2$ , and  $n_3$  are integer.

<sup>b</sup>  $\{2_{001}|0\}$ ,  $\{^d2_{001}|0\}$ .

<sup>c</sup>  $\{2_{100}|0\}$ ,  $\{2_{010}|0\}$ ,  $\{2_{110}|0\}$ ,  $\{^d2_{100}|0\}$ ,  $\{^d2_{010}|0\}$ ,  $\{^d2_{110}|0\}$ .

<sup>d</sup>  $\{2_{1\bar{1}0}|0\}$ ,  $\{2_{120}|0\}$ ,  $\{2_{210}|0\}$ ,  $\{^d2_{1\bar{1}0}|0\}$ ,  $\{^d2_{120}|0\}$ ,  $\{^d2_{210}|0\}$ .

<sup>e</sup>  $\{3_{001}^+|0\}$ ,  $\{3_{001}^-|0\}$ .

<sup>f</sup>  $\{6_{001}^+|0\}$ ,  $\{6_{001}^-|0\}$ .

<sup>g</sup>  $\{1|0\}$ .

<sup>h</sup>  $\{m_{001}|0\}$ ,  $\{^dm_{001}|0\}$ .

<sup>i</sup>  $\{m_{100}|0\}$ ,  $\{m_{010}|0\}$ ,  $\{m_{110}|0\}$ ,  $\{^dm_{100}|0\}$ ,  $\{^dm_{010}|0\}$ ,  $\{^dm_{110}|0\}$ .

<sup>j</sup>  $\{m_{1\bar{1}0}|0\}$ ,  $\{m_{120}|0\}$ ,  $\{m_{210}|0\}$ ,  $\{^dm_{1\bar{1}0}|0\}$ ,  $\{^dm_{120}|0\}$ ,  $\{^dm_{210}|0\}$ .

<sup>k</sup>  $\{3_{001}^+|0\}$ ,  $\{3_{001}^-|0\}$ .

<sup>l</sup>  $\{6_{001}^+|0\}$ ,  $\{6_{001}^-|0\}$ .

<sup>m</sup>  $\{^d1|0\}$ .

<sup>n</sup>  $\{^d3_{001}^+|0\}$ ,  $\{^d3_{001}^-|0\}$ .

<sup>o</sup>  $\{^d6_{001}^+|0\}$ ,  $\{^d6_{001}^-|0\}$ .

<sup>p</sup>  $\{^d1|0\}$ .

<sup>q</sup>  $\{^d3_{001}^+|0\}$ ,  $\{^d3_{001}^-|0\}$ .

<sup>r</sup>  $\{^d6_{001}^+|0\}$ ,  $\{^d6_{001}^-|0\}$ .

<sup>s</sup> Type (a), (b), and (c) correspond to the Frobenius-Schur test of +1, -1, and 0, respectively.

TABLE S II. Character table at the  $M$  point [ $\mathbf{k}_M = \frac{2\pi}{a}(\frac{1}{2}, 0, 0)$ ] of the space group  $P6/mmm$ , which transforms isomorphically to the point group  $mmm(D_{2h})$ .

|             | {1} <sup>a</sup> | {2} <sup>b</sup> | {2 <sub>v</sub> } <sup>c</sup> | {2 <sub>v'</sub> } <sup>d</sup> | { $\bar{1}$ } <sup>e</sup> | { $m$ } <sup>f</sup> | { $m_v$ } <sup>g</sup> | { $m_{v'}$ } <sup>h</sup> | { <sup>d</sup> 1} <sup>i</sup> | { <sup>d</sup> $\bar{1}$ } <sup>j</sup> | Type <sup>k</sup> |
|-------------|------------------|------------------|--------------------------------|---------------------------------|----------------------------|----------------------|------------------------|---------------------------|--------------------------------|-----------------------------------------|-------------------|
| $M_1^+$     | $1 \cdot T_M^1$  | 1                | 1                              | 1                               | 1                          | 1                    | 1                      | 1                         | 1                              | 1                                       | (a)               |
| $M_1^-$     | $1 \cdot T_M$    | 1                | 1                              | 1                               | -1                         | -1                   | -1                     | -1                        | 1                              | -1                                      | (a)               |
| $M_2^+$     | $1 \cdot T_M$    | 1                | -1                             | -1                              | 1                          | 1                    | -1                     | -1                        | 1                              | 1                                       | (a)               |
| $M_2^-$     | $1 \cdot T_M$    | 1                | -1                             | -1                              | -1                         | -1                   | 1                      | 1                         | 1                              | -1                                      | (a)               |
| $M_3^+$     | $1 \cdot T_M$    | -1               | 1                              | -1                              | 1                          | -1                   | 1                      | -1                        | 1                              | 1                                       | (a)               |
| $M_3^-$     | $1 \cdot T_M$    | -1               | 1                              | -1                              | -1                         | 1                    | -1                     | 1                         | 1                              | -1                                      | (a)               |
| $M_4^+$     | $1 \cdot T_M$    | -1               | -1                             | 1                               | 1                          | -1                   | -1                     | 1                         | 1                              | 1                                       | (a)               |
| $M_4^-$     | $1 \cdot T_M$    | -1               | -1                             | 1                               | -1                         | 1                    | 1                      | -1                        | 1                              | -1                                      | (a)               |
| $\bar{M}_5$ | $2 \cdot T_M$    | 0                | 0                              | 0                               | 2                          | 0                    | 0                      | 0                         | -2                             | -2                                      | (b)               |
| $\bar{M}_6$ | $2 \cdot T_M$    | 0                | 0                              | 0                               | -2                         | 0                    | 0                      | 0                         | -2                             | 2                                       | (b)               |

<sup>a</sup>  $\{1|\mathbf{R}_n = n_1\mathbf{a}_1 + n_2\mathbf{a}_2 + n_3\mathbf{a}_3\}$ , where  $\mathbf{a}_1 = a(\frac{\sqrt{3}}{2}, -\frac{1}{2}, 0)$ ,  $\mathbf{a}_2 = a(0, 1, 0)$ , and  $\mathbf{a}_3 = c(0, 0, 1)$  and  $n_1$ ,  $n_2$ , and  $n_3$  are integer.

<sup>b</sup>  $\{2_{001}|0\}, \{^d2_{001}|0\}$ .

<sup>c</sup>  $\{2_{010}|0\}, \{^d2_{010}|0\}$ .

<sup>d</sup>  $\{2_{210}|0\}, \{^d2_{210}|0\}$ .

<sup>e</sup>  $\{\bar{1}|0\}$ .

<sup>f</sup>  $\{m_{001}|0\}, \{^dm_{001}|0\}$ .

<sup>g</sup>  $\{m_{010}|0\}, \{^dm_{010}|0\}$ .

<sup>h</sup>  $\{m_{210}|0\}, \{^dm_{210}|0\}$ .

<sup>i</sup>  $\{^d1|0\}$ .

<sup>j</sup>  $\{^d\bar{1}|0\}$ .

<sup>k</sup> Type (a), (b), and (c) correspond to the Frobenius-Schur test of +1, -1, and 0, respectively.

<sup>l</sup>  $T_M = e^{-i\mathbf{k}_M \cdot \mathbf{R}_n}$

TABLE S III. Character table at the  $K$  point [ $\mathbf{k}_K = \frac{2\pi}{a}(\frac{1}{3}, \frac{1}{3}, 0)$ ] of the space group  $P6/mmm$ , which transforms isomorphically to the point group  $\bar{6}m2(D_{3h})$ .

|             | {1} <sup>a</sup> | {2 <sub>v</sub> } <sup>b</sup> | {3} <sup>c</sup> | { $m$ } <sup>d</sup> | { $m_{v'}$ } <sup>e</sup> | { $\bar{6}$ } <sup>f</sup> | { <sup>d</sup> 1} <sup>g</sup> | { <sup>d</sup> 3} <sup>h</sup> | { <sup>d</sup> $\bar{6}$ } <sup>i</sup> | Type <sup>j</sup> |
|-------------|------------------|--------------------------------|------------------|----------------------|---------------------------|----------------------------|--------------------------------|--------------------------------|-----------------------------------------|-------------------|
| $K_1$       | $1 \cdot T_K^k$  | 1                              | 1                | 1                    | 1                         | 1                          | 1                              | 1                              | 1                                       | (a)               |
| $K_2$       | $1 \cdot T_K$    | 1                              | 1                | -1                   | -1                        | -1                         | 1                              | 1                              | -1                                      | (a)               |
| $K_3$       | $1 \cdot T_K$    | -1                             | 1                | -1                   | 1                         | -1                         | 1                              | 1                              | -1                                      | (a)               |
| $K_4$       | $1 \cdot T_K$    | -1                             | 1                | 1                    | -1                        | 1                          | 1                              | 1                              | 1                                       | (a)               |
| $K_5$       | $2 \cdot T_K$    | 0                              | -1               | 2                    | 0                         | -1                         | 2                              | -1                             | -1                                      | (a)               |
| $K_6$       | $2 \cdot T_K$    | 0                              | -1               | -2                   | 0                         | 1                          | 2                              | -1                             | 1                                       | (a)               |
| $\bar{K}_7$ | $2 \cdot T_K$    | 0                              | -2               | 0                    | 0                         | 0                          | -2                             | 2                              | 0                                       | (b)               |
| $\bar{K}_8$ | $2 \cdot T_K$    | 0                              | 1                | 0                    | 0                         | $-\sqrt{3}$                | -2                             | -1                             | $\sqrt{3}$                              | (b)               |
| $\bar{K}_9$ | $2 \cdot T_K$    | 0                              | 1                | 0                    | 0                         | $\sqrt{3}$                 | -2                             | -1                             | $-\sqrt{3}$                             | (b)               |

<sup>a</sup>  $\{1|\mathbf{R}_n = n_1\mathbf{a}_1 + n_2\mathbf{a}_2 + n_3\mathbf{a}_3\}$ , where  $\mathbf{a}_1 = a(\frac{\sqrt{3}}{2}, -\frac{1}{2}, 0)$ ,  $\mathbf{a}_2 = a(0, 1, 0)$ , and  $\mathbf{a}_3 = c(0, 0, 1)$  and  $n_1$ ,  $n_2$ , and  $n_3$  are integer.

<sup>b</sup>  $\{2_{100}|0\}, \{2_{010}|0\}, \{2_{110}|0\}, \{^d2_{100}|0\}, \{^d2_{010}|0\}, \{^d2_{110}|0\}$ .

<sup>c</sup>  $\{3_{001}^+|0\}, \{3_{001}^-|0\}$ .

<sup>d</sup>  $\{m_{001}|0\}, \{^dm_{001}|0\}$ .

<sup>e</sup>  $\{m_{1\bar{1}0}|0\}, \{m_{120}|0\}, \{m_{210}|0\}, \{^dm_{1\bar{1}0}|0\}, \{^dm_{120}|0\}, \{^dm_{210}|0\}$ .

<sup>f</sup>  $\{\bar{6}_{001}^+|0\}, \{\bar{6}_{001}^-|0\}$ .

<sup>g</sup>  $\{^d1|0\}$ .

<sup>h</sup>  $\{^d3_{001}^+|0\}, \{^d3_{001}^-|0\}$ .

<sup>i</sup>  $\{^d\bar{6}_{001}^+|0\}, \{^d\bar{6}_{001}^-|0\}$ .

<sup>j</sup> Type (a), (b), and (c) correspond to the Frobenius-Schur test of +1, -1, and 0, respectively.

<sup>k</sup>  $T_K = e^{-i\mathbf{k}_K \cdot \mathbf{R}_n}$

TABLE SIV. Representation of the atomic orbital at the  $\Gamma$  point of the space group  $P6/mmm$ .

|                              | {1} | {2} | {2 <sub>v</sub> } | {2 <sub>v'</sub> } | {3} | {6}        | { $\bar{1}$ } | { $m$ } | { $m_v$ } | { $m_{v'}$ } | { $\bar{3}$ } | { $\bar{6}$ } | Decomposition                                                |
|------------------------------|-----|-----|-------------------|--------------------|-----|------------|---------------|---------|-----------|--------------|---------------|---------------|--------------------------------------------------------------|
| $\Gamma_s^{\text{orb}}$      | 1   | 1   | 1                 | 1                  | 1   | 1          | 1             | 1       | 1         | 1            | 1             | 1             | $\Gamma_1^+$                                                 |
| $\Gamma_p^{\text{orb}}$      | 3   | -1  | -1                | -1                 | 0   | 2          | -3            | 1       | 1         | 1            | 0             | -2            | $\Gamma_2^- \oplus \Gamma_6^-$                               |
| $\Gamma_d^{\text{orb}}$      | 5   | 1   | 1                 | 1                  | -1  | 1          | 5             | 1       | 1         | 1            | -1            | 1             | $\Gamma_1^+ \oplus \Gamma_5^+ \oplus \Gamma_6^+$             |
| $\Gamma_{s1/2}^{\text{orb}}$ | 2   | 0   | 0                 | 0                  | 1   | $\sqrt{3}$ | 2             | 0       | 0         | 0            | 1             | $\sqrt{3}$    | $\bar{\Gamma}_9$                                             |
| $\Gamma_{p1/2}^{\text{orb}}$ | 2   | 0   | 0                 | 0                  | 1   | $\sqrt{3}$ | -2            | 0       | 0         | 0            | -1            | $-\sqrt{3}$   | $\bar{\Gamma}_{12}$                                          |
| $\Gamma_{p3/2}^{\text{orb}}$ | 4   | 0   | 0                 | 0                  | -1  | $\sqrt{3}$ | -4            | 0       | 0         | 0            | 1             | $-\sqrt{3}$   | $\bar{\Gamma}_{10} \oplus \bar{\Gamma}_{12}$                 |
| $\Gamma_{d3/2}^{\text{orb}}$ | 4   | 0   | 0                 | 0                  | -1  | $\sqrt{3}$ | 4             | 0       | 0         | 0            | -1            | $\sqrt{3}$    | $\bar{\Gamma}_7 \oplus \bar{\Gamma}_9$                       |
| $\Gamma_{d5/2}^{\text{orb}}$ | 6   | 0   | 0                 | 0                  | 0   | 0          | 6             | 0       | 0         | 0            | 0             | 0             | $\bar{\Gamma}_7 \oplus \bar{\Gamma}_8 \oplus \bar{\Gamma}_9$ |

TABLE SV. Representation of the atomic orbital at the  $M$  point of the space group  $P6/mmm$ .

|                         | {1} | {2} | {2 <sub>v</sub> } | {2 <sub>v'</sub> } | { $\bar{1}$ } | { $m$ } | { $m_v$ } | { $m_{v'}$ } | Decomposition                                   |
|-------------------------|-----|-----|-------------------|--------------------|---------------|---------|-----------|--------------|-------------------------------------------------|
| $M_s^{\text{orb}}$      | 1   | 1   | 1                 | 1                  | 1             | 1       | 1         | 1            | $M_1^+$                                         |
| $M_p^{\text{orb}}$      | 3   | -1  | -1                | -1                 | -3            | 1       | 1         | 1            | $M_2^- \oplus M_3^- \oplus M_4^-$               |
| $M_d^{\text{orb}}$      | 5   | 1   | 1                 | 1                  | 5             | 1       | 1         | 1            | $2M_1^+ \oplus M_2^+ \oplus M_3^+ \oplus M_4^+$ |
| $M_{s1/2}^{\text{orb}}$ | 2   | 0   | 0                 | 0                  | 2             | 0       | 0         | 0            | $\bar{M}_5$                                     |
| $M_{p1/2}^{\text{orb}}$ | 2   | 0   | 0                 | 0                  | -2            | 0       | 0         | 0            | $\bar{M}_6$                                     |
| $M_{p3/2}^{\text{orb}}$ | 4   | 0   | 0                 | 0                  | -4            | 0       | 0         | 0            | $2\bar{M}_6$                                    |
| $M_{d3/2}^{\text{orb}}$ | 4   | 0   | 0                 | 0                  | 4             | 0       | 0         | 0            | $2\bar{M}_5$                                    |
| $M_{d5/2}^{\text{orb}}$ | 6   | 0   | 0                 | 0                  | 6             | 0       | 0         | 0            | $3\bar{M}_5$                                    |

TABLE S VI. Representation of the atomic orbital at the  $K$  point of the space group  $P6/mmm$ .

|                         | {1} | {2 <sub>v</sub> } | {3} | { $m$ } | { $m_{v'}$ } | { $\bar{6}$ } | Decomposition                                 |
|-------------------------|-----|-------------------|-----|---------|--------------|---------------|-----------------------------------------------|
| $K_s^{\text{orb}}$      | 1   | 1                 | 1   | 1       | 1            | 1             | $K_1$                                         |
| $K_p^{\text{orb}}$      | 3   | -1                | 0   | 1       | 1            | -2            | $K_3 \oplus K_5$                              |
| $K_d^{\text{orb}}$      | 5   | 1                 | -1  | 1       | 1            | 1             | $K_1 \oplus K_5 \oplus K_6$                   |
| $K_{s1/2}^{\text{orb}}$ | 2   | 0                 | 1   | 0       | 0            | $\sqrt{3}$    | $\bar{K}_9$                                   |
| $K_{p1/2}^{\text{orb}}$ | 2   | 0                 | 1   | 0       | 0            | $-\sqrt{3}$   | $\bar{K}_8$                                   |
| $K_{p3/2}^{\text{orb}}$ | 4   | 0                 | -1  | 0       | 0            | $-\sqrt{3}$   | $\bar{K}_7 \oplus \bar{K}_8$                  |
| $K_{d3/2}^{\text{orb}}$ | 4   | 0                 | -1  | 0       | 0            | $\sqrt{3}$    | $\bar{K}_7 \oplus \bar{K}_9$                  |
| $K_{d5/2}^{\text{orb}}$ | 6   | 0                 | 0   | 0       | 0            | 0             | $\bar{K}_7 \oplus \bar{K}_8 \oplus \bar{K}_9$ |

TABLE S VII. Representation of the atomic arrangement of  $C_2$  ( $\frac{2}{3}, \frac{1}{3}, 0$ ) and ( $\frac{1}{3}, \frac{2}{3}, 0$ ) at the  $\Gamma$  point of the space group  $P6/mmm$ .

|                             | {1}          | {2}          | {2 <sub>v</sub> } | {2 <sub>v'</sub> } | {3}          | {6}          | { $\bar{1}$ } | { $m$ }      | { $m_v$ }    | { $m_{v'}$ } | { $\bar{3}$ } | { $\bar{6}$ } | Decomposition                  |
|-----------------------------|--------------|--------------|-------------------|--------------------|--------------|--------------|---------------|--------------|--------------|--------------|---------------|---------------|--------------------------------|
| $\mathbf{G}$                | $\mathbf{0}$ | $\mathbf{0}$ | $\mathbf{0}$      | $\mathbf{0}$       | $\mathbf{0}$ | $\mathbf{0}$ | $\mathbf{0}$  | $\mathbf{0}$ | $\mathbf{0}$ | $\mathbf{0}$ | $\mathbf{0}$  | $\mathbf{0}$  |                                |
| $\Gamma_{C_2}^{\text{arr}}$ | 2            | 0            | 0                 | 2                  | 2            | 0            | 0             | 2            | 2            | 0            | 0             | 2             | $\Gamma_1^+ \oplus \Gamma_4^-$ |

TABLE S VIII. Representation of the atomic arrangement of  $C_2$  ( $\frac{2}{3}, \frac{1}{3}, 0$ ) and ( $\frac{1}{3}, \frac{2}{3}, 0$ ) at the  $M$  point of the space group  $P6/mmm$ .

|                        | {1}          | {2}        | {2 <sub>v</sub> } | {2 <sub>v'</sub> } | { $\bar{1}$ } | { $m$ }      | { $m_v$ }    | { $m_{v'}$ } | Decomposition        |
|------------------------|--------------|------------|-------------------|--------------------|---------------|--------------|--------------|--------------|----------------------|
| $\mathbf{G}$           | $\mathbf{0}$ | (-1, 0, 0) | (-1, 0, 0)        | $\mathbf{0}$       | (-1, 0, 0)    | $\mathbf{0}$ | $\mathbf{0}$ | (-1, 0, 0)   |                      |
| $M_{C_2}^{\text{arr}}$ | 2            | 0          | 0                 | 2                  | 0             | 2            | 2            | 0            | $M_1^+ \oplus M_4^-$ |

TABLE S IX. Representation of the atomic arrangement of  $C_2$  ( $\frac{2}{3}, \frac{1}{3}, 0$ ) and ( $\frac{1}{3}, \frac{2}{3}, 0$ ) at the  $K$  point of the space group  $P6/mmm$ .

|                        | {1}          | {2 <sub>v</sub> } | {3}        | { $m$ }      | { $m_{v'}$ } | { $\bar{6}$ } | Decomposition |
|------------------------|--------------|-------------------|------------|--------------|--------------|---------------|---------------|
| $\mathbf{G}$           | $\mathbf{0}$ | (0, -1, 0)        | (-1, 0, 0) | $\mathbf{0}$ | $\mathbf{0}$ | (0, -1, 0)    |               |
| $K_{C_2}^{\text{arr}}$ | 2            | 0                 | -1         | 2            | 0            | -1            | $K_5$         |

TABLE SX. Representation of the atomic wavefunction of  $C_2 (\frac{2}{3}, \frac{1}{3}, 0)$  and  $(\frac{1}{3}, \frac{2}{3}, 0)$  at the  $\Gamma$  point of the space group  $P6/mmm$ .

|               | {1} | {2} | {2 <sub>v</sub> } | {2 <sub>v'</sub> } | {3} | {6} | { $\bar{1}$ } | { $m$ } | { $m_v$ } | { $m_{v'}$ } | {3} | { $\bar{6}$ } | Decomposition                                                                                                                           |
|---------------|-----|-----|-------------------|--------------------|-----|-----|---------------|---------|-----------|--------------|-----|---------------|-----------------------------------------------------------------------------------------------------------------------------------------|
| $C_2 s$       | 2   | 0   | 0                 | 2                  | 2   | 0   | 0             | 2       | 2         | 0            | 0   | 2             | $\Gamma_1^+ \oplus \Gamma_4^-$                                                                                                          |
| $C_2 p$       | 6   | 0   | 0                 | -2                 | 0   | 0   | 0             | 2       | 2         | 0            | 0   | -4            | $\Gamma_2^- \oplus \Gamma_3^+ \oplus \Gamma_5^+ \oplus \Gamma_6^-$                                                                      |
| $C_2 d$       | 10  | 0   | 0                 | 2                  | -2  | 0   | 0             | 2       | 2         | 0            | 0   | 2             | $\Gamma_1^+ \oplus \Gamma_4^- \oplus \Gamma_5^+ \oplus \Gamma_5^- \oplus \Gamma_6^+ \oplus \Gamma_6^-$                                  |
| $C_2 s_{1/2}$ | 4   | 0   | 0                 | 0                  | 2   | 0   | 0             | 0       | 0         | 0            | 0   | $2\sqrt{3}$   | $\bar{\Gamma}_9 \oplus \bar{\Gamma}_{11}$                                                                                               |
| $C_2 p_{1/2}$ | 4   | 0   | 0                 | 0                  | 2   | 0   | 0             | 0       | 0         | 0            | 0   | $-2\sqrt{3}$  | $\bar{\Gamma}_8 \oplus \bar{\Gamma}_{12}$                                                                                               |
| $C_2 p_{3/2}$ | 8   | 0   | 0                 | 0                  | -2  | 0   | 0             | 0       | 0         | 0            | 0   | $-2\sqrt{3}$  | $\bar{\Gamma}_7 \oplus \bar{\Gamma}_8 \oplus \bar{\Gamma}_{10} \oplus \bar{\Gamma}_{12}$                                                |
| $C_2 d_{3/2}$ | 8   | 0   | 0                 | 0                  | -2  | 0   | 0             | 0       | 0         | 0            | 0   | $2\sqrt{3}$   | $\bar{\Gamma}_7 \oplus \bar{\Gamma}_9 \oplus \bar{\Gamma}_{10} \oplus \bar{\Gamma}_{11}$                                                |
| $C_2 d_{5/2}$ | 12  | 0   | 0                 | 0                  | 0   | 0   | 0             | 0       | 0         | 0            | 0   | 0             | $\bar{\Gamma}_7 \oplus \bar{\Gamma}_8 \oplus \bar{\Gamma}_9 \oplus \bar{\Gamma}_{10} \oplus \bar{\Gamma}_{11} \oplus \bar{\Gamma}_{12}$ |

TABLE SXI. Representation of the atomic wavefunction of  $C_2 (\frac{2}{3}, \frac{1}{3}, 0)$  and  $(\frac{1}{3}, \frac{2}{3}, 0)$  at the  $M$  point of the space group  $P6/mmm$ .

|               | {1} | {2} | {2 <sub>v</sub> } | {2 <sub>v'</sub> } | { $\bar{1}$ } | { $m$ } | { $m_v$ } | { $m_{v'}$ } | Decomposition                                                                                        |
|---------------|-----|-----|-------------------|--------------------|---------------|---------|-----------|--------------|------------------------------------------------------------------------------------------------------|
| $C_2 s$       | 2   | 0   | 0                 | 2                  | 0             | 2       | 2         | 0            | $M_1^+ \oplus M_4^-$                                                                                 |
| $C_2 p$       | 6   | 0   | 0                 | -2                 | 0             | 2       | 2         | 0            | $M_1^+ \oplus M_2^+ \oplus M_2^- \oplus M_3^+ \oplus M_3^- \oplus M_4^-$                             |
| $C_2 d$       | 10  | 0   | 0                 | 2                  | 0             | 2       | 2         | 0            | $2M_1^+ \oplus M_1^- \oplus M_2^+ \oplus M_2^- \oplus M_3^+ \oplus M_3^- \oplus M_4^- \oplus 2M_4^-$ |
| $C_2 s_{1/2}$ | 4   | 0   | 0                 | 0                  | 0             | 0       | 0         | 0            | $\bar{M}_5 \oplus \bar{M}_6$                                                                         |
| $C_2 p_{1/2}$ | 4   | 0   | 0                 | 0                  | 0             | 0       | 0         | 0            | $\bar{M}_5 \oplus \bar{M}_6$                                                                         |
| $C_2 p_{3/2}$ | 8   | 0   | 0                 | 0                  | 0             | 0       | 0         | 0            | $2\bar{M}_5 \oplus 2\bar{M}_6$                                                                       |
| $C_2 d_{3/2}$ | 8   | 0   | 0                 | 0                  | 0             | 0       | 0         | 0            | $2\bar{M}_5 \oplus 2\bar{M}_6$                                                                       |
| $C_2 d_{5/2}$ | 12  | 0   | 0                 | 0                  | 0             | 0       | 0         | 0            | $3\bar{M}_5 \oplus 3\bar{M}_6$                                                                       |

TABLE SXII. Representation of the atomic wavefunction of  $C_2 (\frac{2}{3}, \frac{1}{3}, 0)$  and  $(\frac{1}{3}, \frac{2}{3}, 0)$  at the  $K$  point of the space group  $P6/mmm$ .

|               | {1} | {2 <sub>v</sub> } | {3} | { $m$ } | { $m_{v'}$ } | { $\bar{6}$ } | Decomposition                                                 |
|---------------|-----|-------------------|-----|---------|--------------|---------------|---------------------------------------------------------------|
| $C_2 s$       | 2   | 0                 | -1  | 2       | 0            | -1            | $K_5$                                                         |
| $C_2 p$       | 6   | 0                 | 0   | 2       | 0            | 2             | $K_1 \oplus K_4 \oplus K_5 \oplus K_6$                        |
| $C_2 d$       | 10  | 0                 | 1   | 2       | 0            | -1            | $K_1 \oplus K_2 \oplus K_3 \oplus K_4 \oplus 2K_5 \oplus K_6$ |
| $C_2 s_{1/2}$ | 4   | 0                 | -1  | 0       | 0            | $-\sqrt{3}$   | $\bar{K}_7 \oplus \bar{K}_8$                                  |
| $C_2 p_{1/2}$ | 4   | 0                 | -1  | 0       | 0            | $\sqrt{3}$    | $\bar{K}_7 \oplus \bar{K}_9$                                  |
| $C_2 p_{3/2}$ | 8   | 0                 | 1   | 0       | 0            | $\sqrt{3}$    | $\bar{K}_7 \oplus \bar{K}_8 \oplus 2\bar{K}_9$                |
| $C_2 d_{3/2}$ | 8   | 0                 | 1   | 0       | 0            | $-\sqrt{3}$   | $\bar{K}_7 \oplus 2\bar{K}_8 \oplus \bar{K}_9$                |
| $C_2 d_{5/2}$ | 12  | 0                 | 0   | 0       | 0            | 0             | $2\bar{K}_7 \oplus 2\bar{K}_8 \oplus 2\bar{K}_9$              |
